# Supplementary material
Source: PubMed Central journal article supplement (PMC10704340)

## Supplemental Online Content

Lambertini M, Blondeaux E, Agostinetti E, et al; BRCA BCY Collaboration. Pregnancy after breast cancer in young *BRCA* carriers: an international hospital-based cohort study. *JAMA*. Published online December 7, 2023. doi:10.1001/jama.2023.25463

### List of abbreviations

**eAppendix.** Supplementary methods and results - secondary matched analysis

**eTable 1.** Pattern of invasive disease-free survival events

**eTable 2.** Patient characteristics at diagnosis of breast cancer among patients included in the secondary matched analysis

**eTable 3.** Pregnancy, fetal, and obstetric outcomes in patients with a pregnancy after breast cancer included in the secondary matched analysis

**eTable 4.** Subgroup analyses of disease-free survival (patients with a pregnancy vs. patients with no pregnancy)

**eTable 5.** Subgroup analyses of breast cancer-specific survival (patients with a pregnancy vs. patients with no pregnancy)

**eTable 6.** Subgroup analyses of overall survival (patients with a pregnancy vs. patients with no pregnancy group)

**eTable 7.** Impact of interval between diagnosis and pregnancy, outcome of pregnancy, and breastfeeding status on disease-free survival (patients with a pregnancy vs. patients with no pregnancy)

**eTable 8.** Impact of the interval between diagnosis and pregnancy, outcome of pregnancy, and breastfeeding status on breast cancer-specific survival (patients with a pregnancy vs. patients with no pregnancy)

**eTable 9.** Impact of the interval between diagnosis and pregnancy, outcome of pregnancy, and breastfeeding status on overall survival (patients with a pregnancy vs. patients with no pregnancy)

**eFigure 1.** Prognostic impact of pregnancy after breast cancer in young *BRCA* carriers in the secondary matched analysis: disease-free survival

**eFigure 2.** Prognostic impact of pregnancy after breast cancer in young *BRCA* carriers in the secondary matched analysis: breast cancer-specific survival

**eFigure 3.** Prognostic impact of pregnancy after breast cancer in young *BRCA* carriers in the secondary matched analysis: overall survival

This supplemental material has been provided by the authors to give readers additional information about their work.

## **List of abbreviations**

AI, aromatase inhibitors

BC, breast cancer

CI, confidence intervals

ER, estrogen receptor

DFS, disease-free survival

G, tumor grade

HR, hazard ratio

ICSI, intracytoplasmic sperm injection.

IQR, interquartile range

IVF, *in vitro* fertilization

LHRHa, luteinizing hormone-releasing hormone agonists

PR, progesterone receptor

N, nodal status

NE, not evaluable

T, tumor size

## eAppendix. Supplementary methods and results – secondary matched analysis

In the secondary matched analysis, each patient with a pregnancy after breast cancer (patient with a pregnancy) was matched with 3 patients without subsequent pregnancy (patient with no pregnancy). Each matched patient with no pregnancy had to have a disease-free interval  $\geq$  than the time occurring between breast cancer diagnosis and conception of the matched patient with a pregnancy. Patients with a pregnancy following a disease-free survival event were dropped from this analysis. Other matching factors included specific *BRCA* gene (*BRCA1* vs. *BRCA2*), hormone receptor status (positive vs. negative), nodal status (negative vs. positive), and year at diagnosis ( $\pm 2.5$  years within the same category of the year). Because all included patients were diagnosed at age 40 years or younger, matching according to age was not performed. The matching was performed centrally with an automated system blinded to patients' outcomes. To avoid the potential exclusion of patients with missing value of one of the matching factors, single imputation assuming monotone missing pattern and using the logistic regression method was performed before matching only on matching factors: *BRCA* status (for patients with unknown data on the specific *BRCA* gene carrying a pathogenic variant), hormone receptor status and nodal status. *BRCA* status was missing in 10 (0.2%) patients, nodal status in 186 (3.9%) and hormone receptor status in 77 (1.6%).

In the secondary matched analysis, after excluding 43 patients with a pregnancy due to the development of a disease-free survival event before conceiving and 3 patients with a pregnancy that could not be matched, 2,452 were included of whom 613 had a pregnancy and 1,839 did not. As per matching criteria, no difference in year at breast cancer diagnosis, nodal status, hormone receptor status, and specific *BRCA* gene was observed between patients with a pregnancy and matched patients with no pregnancy (eTable 2). As compared to matched patients with no pregnancy, patients with a pregnancy were significantly younger at diagnosis, more likely to receive ovarian suppression as part of adjuvant endocrine therapy with its total duration being shorter (eTable 2).

As compared to matched patients with no pregnancy, patients with a pregnancy had significantly improved disease-free survival (HR 0.63; 95% CI 0.53-0.74;  $P < .001$ ; eFigure 1 in the Supplement). In subgroup analyses, a significant interaction was observed between occurrence of pregnancy and both specific *BRCA* gene (*BRCA1*: adjusted HR 0.51; 95% CI 0.41-0.62; *BRCA2*: adjusted HR 1.07; 95% CI 0.79-1.45;  $P < .001$  for interaction) and hormone receptor status (hormone receptor-positive: adjusted HR 0.81; 95% CI 0.60-1.09; hormone receptor-negative: adjusted HR 0.55; 95% CI 0.45-0.68;  $P = .04$  for interaction, eTable 4 in the Supplement). Patients with a pregnancy had significantly improved breast cancer-specific survival (HR 0.43; 95% CI 0.30-0.63;  $P < .001$ ; eFigure 2 in the Supplement) and overall survival (HR 0.43; 95% CI 0.30-0.61;  $P < .001$ ; eFigure 3 in the Supplement). Subgroup analyses showed a significant interaction between occurrence of pregnancy and specific *BRCA* gene for both breast cancer-specific survival (*BRCA1*: adjusted HR 0.30; 95% CI 0.18-0.50; *BRCA2*: adjusted HR 0.83; 95% CI 0.47-1.46;  $P = .04$  for interaction, eTable 5 in the Supplement) and overall survival (*BRCA1*: adjusted HR 0.29; 95% CI 0.18-0.48; *BRCA2*: adjusted HR 0.81; 95% CI 0.48-1.39;  $P = .02$  for interaction, eTable 6 in the Supplement). No interaction between occurrence of pregnancy and interval since diagnosis, pregnancy outcome, or breastfeeding status on disease-free survival (eTable 7 in the Supplement), breast cancer-specific survival (eTable 8 in the Supplement) or overall survival (eTable 9 in the Supplement) was observed.

**eTable 1. Pattern of invasive disease-free survival events.**

|                                                                        | <b>Patients with a pregnancy<br/>n=659</b> | <b>Patients with no pregnancy<br/>n=4073</b> |
|------------------------------------------------------------------------|--------------------------------------------|----------------------------------------------|
| Follow-up, median (IQR) years                                          | 9.6 (6.5-13.8)                             | 7.4 (4.2-12.3)                               |
| DFS events/100*person-year                                             | 5.44                                       | 5.45                                         |
| Type of DFS events                                                     |                                            |                                              |
| Loco-regional recurrence events/100*person-year                        | 1.22                                       | 1.20                                         |
| Distant (±loco-regional) recurrence events/100*person-year             | 1.29                                       | 1.82                                         |
| Second primary malignancy, except breast cancer events/100*person-year | 0.37                                       | 0.63                                         |
| Second primary breast cancer events/100*person-year                    | 2.57                                       | 1.64                                         |
| Death without any prior DFS event/100*person-year                      | 0                                          | 0.15                                         |

One patient in the non-pregnant cohort had loco-regional recurrence and 2<sup>nd</sup> primary breast cancer at the same date.

Abbreviations: IQR, interquartile range; DFS, disease-free survival.

**eTable 2. Patient characteristics at diagnosis of breast cancer among patients included in the secondary matched analysis.**

|                                      | No. (%)                      |                                                        |                                                   |
|--------------------------------------|------------------------------|--------------------------------------------------------|---------------------------------------------------|
|                                      | Overall cohort<br>(n = 2452) | Patients with a<br>pregnancy<br>(n = 613) <sup>a</sup> | Matched patients<br>with no pregnancy<br>(n=1839) |
| Region                               |                              |                                                        |                                                   |
| Southern Europe                      | 1117 (45.6)                  | 281 (45.8)                                             | 836 (45.5)                                        |
| Asia                                 | 412 (16.8)                   | 122 (19.9)                                             | 290 (15.8)                                        |
| Northern Europe                      | 364 (14.9)                   | 98 (16.0)                                              | 266 (14.5)                                        |
| North America                        | 266 (10.9)                   | 59 (9.6)                                               | 207 (11.3)                                        |
| Eastern Europe                       | 127 (5.2)                    | 20 (3.3)                                               | 107 (5.8)                                         |
| Australia/Oceania                    | 97 (4.0)                     | 24 (3.9)                                               | 73 (4.0)                                          |
| Latin/South America                  | 69 (2.8)                     | 9 (1.5)                                                | 60 (3.3)                                          |
| Year at diagnosis of breast cancer   |                              |                                                        |                                                   |
| 2000-2004                            | 368 (15.0)                   | 92 (15.0)                                              | 276 (15.0)                                        |
| 2005-2008                            | 512 (20.9)                   | 128 (20.9)                                             | 384 (20.9)                                        |
| 2009-2012                            | 640 (26.1)                   | 160 (26.1)                                             | 480 (26.1)                                        |
| 2013-2016                            | 608 (24.8)                   | 152 (24.8)                                             | 456 (24.8)                                        |
| 2017-2020                            | 324 (13.2)                   | 81 (13.2)                                              | 243 (13.2)                                        |
| Age at diagnosis of breast cancer, y |                              |                                                        |                                                   |
| ≤ 30 years                           | 591 (24.1)                   | 308 (50.2)                                             | 283 (15.4)                                        |
| 31-35 years                          | 922 (37.6)                   | 242 (39.5)                                             | 680 (37.0)                                        |
| 36-40 years                          | 939 (38.3)                   | 63 (10.3)                                              | 876 (47.6)                                        |
| Median (IQR)                         | 34 (31-37)                   | 30 (28-33)                                             | 35 (32-38)                                        |
| Specific <i>BRCA</i> gene            |                              |                                                        |                                                   |
| <i>BRCA1</i>                         | 1804 (73.6)                  | 451 (73.6)                                             | 1353 (73.6)                                       |
| <i>BRCA2</i>                         | 644 (26.3)                   | 161 (26.3)                                             | 483 (26.3)                                        |
| <i>BRCA1</i> and <i>BRCA2</i>        | 4 (0.2)                      | 1 (0.2)                                                | 3 (0.2)                                           |
| Tumor characteristics                |                              |                                                        |                                                   |
| Histology                            | n = 2352                     | n = 588                                                | n = 1764                                          |
| Ductal carcinoma                     | 2045 (87.0)                  | 523 (89.0)                                             | 1524 (86.4)                                       |
| Lobular carcinoma                    | 52 (2.2)                     | 8 (1.4)                                                | 44 (2.5)                                          |
| Mixed ductal/lobular                 | 30 (1.3)                     | 6 (1.0)                                                | 24 (1.4)                                          |
| Invasive, not specified              | 80 (3.4)                     | 23 (3.9)                                               | 57 (3.2)                                          |
| Other <sup>b</sup>                   | 143 (6.1)                    | 28 (4.8)                                               | 115 (6.5)                                         |
| Grade <sup>c</sup>                   | n = 2235                     | n = 564                                                | n = 1671                                          |
| G1                                   | 27 (1.2)                     | 8 (1.4)                                                | 19 (1.1)                                          |
| G2                                   | 421 (18.8)                   | 114 (20.2)                                             | 307 (18.4)                                        |
| G3                                   | 1787 (80.0)                  | 442 (78.4)                                             | 1345 (80.5)                                       |
| Size <sup>d</sup>                    | n = 2334                     | n = 586                                                | n = 1748                                          |
| T1 (≤ 2 cm)                          | 971 (41.6)                   | 258 (44.0)                                             | 713 (40.8)                                        |
| T2 (>2 to ≤ 5 cm)                    | 1079 (46.2)                  | 256 (43.7)                                             | 823 (47.1)                                        |
| T3 (> 5 cm) to T4                    | 284 (12.2)                   | 72 (12.3)                                              | 212 (12.1)                                        |
| Nodal status <sup>d</sup>            | n = 2356                     | n = 593                                                | n = 1763                                          |
| N0                                   | 1455 (61.8)                  | 370 (62.4)                                             | 1085 (61.5)                                       |
| N1                                   | 679 (28.8)                   | 171 (28.8)                                             | 508 (28.8)                                        |
| N2-N3                                | 222 (9.4)                    | 52 (8.8)                                               | 170 (9.6)                                         |
| Hormone receptor status              |                              |                                                        |                                                   |
| ER and/or PR positive                | 816 (33.3)                   | 204 (33.3)                                             | 612 (33.3)                                        |
| ER and PR negative                   | 1636 (66.7)                  | 409 (66.7)                                             | 1227 (66.7)                                       |
| <i>ERBB2</i> status                  | n = 2308                     | n = 581                                                | n = 1727                                          |
| Negative                             | 2157 (93.5)                  | 552 (95.0)                                             | 1605 (92.9)                                       |
| Positive                             | 151 (6.5)                    | 29 (5.0)                                               | 122 (7.1)                                         |
| Treatment                            |                              |                                                        |                                                   |
| Breast surgery                       | n = 2410                     | n = 602                                                | n = 1808                                          |

|                                                                  |                  |                |                  |
|------------------------------------------------------------------|------------------|----------------|------------------|
| None                                                             | 5 (0.2)          | 1 (0.2)        | 4 (0.2)          |
| Breast-conserving surgery                                        | 1110 (46.1)      | 291 (48.3)     | 819 (45.3)       |
| Mastectomy                                                       | 1295 (53.7)      | 310 (51.5)     | 985 (54.5)       |
| Received chemotherapy                                            | 2259/2439 (92.6) | 568/612 (92.8) | 1691/1827 (92.6) |
| Type of chemotherapy <sup>e</sup>                                | n = 2181         | n = 557        | n = 1624         |
| Anthracycline and taxane based                                   | 1512 (69.3)      | 394 (70.7)     | 1118 (68.8)      |
| Anthracycline based                                              | 490 (22.5)       | 126 (22.6)     | 364 (22.4)       |
| Taxane based                                                     | 90 (4.1)         | 17 (3.1)       | 73 (4.5)         |
| Others                                                           | 89 (4.1)         | 20 (3.6)       | 69 (4.3)         |
| Received endocrine therapy <sup>f</sup>                          | 759/810 (93.7)   | 186/203 (91.6) | 573/607 (94.4)   |
| Type of endocrine therapy <sup>g</sup>                           | n = 753          | n = 185        | n = 568          |
| Tamoxifen alone                                                  | 289 (38.4)       | 61 (33.0)      | 228 (40.1)       |
| Tamoxifen plus LHRH agonist                                      | 232 (30.8)       | 77 (41.6)      | 155 (27.3)       |
| LHRH agonist alone                                               | 14 (1.9)         | 5 (2.7)        | 9 (1.6)          |
| Aromatase inhibitor with or without LHRH agonist                 | 88 (11.7)        | 21 (11.4)      | 67 (11.8)        |
| Tamoxifen and aromatase inhibitor (with or without LHRH agonist) | 121 (16.1)       | 17 (9.2)       | 104 (18.3)       |
| Other                                                            | 9 (1.2)          | 4 (2.2)        | 5 (0.9)          |
| Duration of endocrine therapy, median (IQR) mo                   | 60 (36-60)       | 48 (24-60)     | 60 (43-60)       |
| Unknown, No.                                                     | 174              | 38             | 136              |

Abbreviations: IQR, interquartile range; ER, estrogen receptor; PR, progesterone receptor; LHRH, luteinizing hormone-releasing hormone.

<sup>a</sup> Patients with a pregnancy included women with  $\geq 1$  pregnancy (irrespective of their outcome) any time following breast cancer diagnosis. Information on pregnancy after breast cancer was collected from the medical records based on patient self-report during follow-up clinic visits and/or by serial patient survey depending on the center.

<sup>b</sup> Other histology findings included medullary (n = 49), metaplastic (n = 17), mucinous (n = 8), papillary (n = 4), micropapillary (n = 4), pleomorphic variant (n = 3), squamous cell (n = 3), tubular carcinoma (n = 2), apocrine (n = 1), comedocarcinoma (n = 1), cribriform (n = 1), and unknown (n = 50).

<sup>c</sup> Histologic grade was based on the degree of tumor histologic differentiation.

<sup>d</sup> Tumor size and nodal status were assessed clinically for patients who received neoadjuvant systemic therapy and pathologically for those who received breast surgery as first treatment.

<sup>e</sup> Calculated among patients who received chemotherapy.

<sup>f</sup> Calculated among patients with hormone receptor-positive breast cancer.

<sup>g</sup> Calculated among patients with hormone receptor-positive breast cancer who received endocrine therapy.

**eTable 3. Pregnancy, fetal, and obstetric outcomes in patients with a pregnancy after breast cancer included in the secondary matched analysis.**

| <b>Outcomes</b>                                                                    | <b>No. (%) (n = 613)</b> |
|------------------------------------------------------------------------------------|--------------------------|
| Age at pregnancy, median (IQR), y                                                  | 34.6 (31.7-37.2)         |
| Time from diagnosis to conception, median (IQR), y                                 | 3.4 (2.2-5.1)            |
| Pregnancy interval                                                                 |                          |
| ≤ 2 years after diagnosis                                                          | 128 (20.9)               |
| Between >2 and ≤5 years after diagnosis                                            | 330 (53.8)               |
| > 5 years after diagnosis                                                          | 155 (25.3)               |
| Type of conception                                                                 |                          |
| Spontaneous pregnancy                                                              | 434/540 (80.4)           |
| Use of assisted reproductive technology                                            | 106/540 (19.6)           |
| Embryo transfer after oocyte/embryo cryopreservation at diagnosis of breast cancer | 44                       |
| Embryo transfer following oocyte donation                                          | 21                       |
| Ovarian stimulation for IVF/ICSI/ovulation induction after cancer treatment        | 33                       |
| Unknown type of assisted reproductive technology                                   | 8                        |
| Pregnancy outcome                                                                  | n = 604                  |
| Delivered                                                                          | 486 (80.5)               |
| Ongoing pregnancy                                                                  | 21 (3.5)                 |
| Miscarriage                                                                        | 54 (8.9)                 |
| Induced abortion                                                                   | 43 (7.1)                 |
| Number of live births from first pregnancy after breast cancer <sup>a</sup>        | n = 486                  |
| 1                                                                                  | 435 (89.5)               |
| 2                                                                                  | 51 (10.5)                |
| Timing of delivery <sup>a</sup>                                                    | n = 420                  |
| At term (≥37 wk)                                                                   | 382 (90.9)               |
| Preterm (<37 wk)                                                                   | 38 (9.1)                 |
| Complications <sup>a</sup>                                                         | n = 399                  |
| None                                                                               | 345 (86.5)               |
| Pregnancy complications                                                            | 25 (6.3)                 |
| Delivery complications                                                             | 21 (5.3)                 |
| Congenital abnormalities <sup>b,c</sup>                                            | 3 (0.7)                  |
| Fetal complications <sup>b,c</sup>                                                 | 3 (0.7)                  |
| Other complications <sup>c</sup>                                                   | 2 (0.5)                  |
| Breastfeeding <sup>a</sup>                                                         | 126/382 (33.0)           |
| Duration, median (IQR), mo                                                         | 4.5 (2-6)                |
| Unknown, No.                                                                       | 47                       |

Abbreviation: IQR, interquartile range, IVF, *in vitro* fertilization ICSI, intracytoplasmic sperm injection.

<sup>a</sup> Calculated from the total number of delivered pregnancies.

<sup>b</sup> Calculated from the total number of infants born to patients with known information on pregnancy complications (n = 445).

<sup>c</sup> Congenital abnormalities included: cardiac malformations (n = 2) and chromosome abnormality with karyotype 47,XXY (n = 1).

Fetal complications included: respiratory distress (n = 2), neonatal icterus treated with phototherapy (n = 1).

Other complications included maternal internal carotid artery aneurysm (n = 1) and kidney failure in the child due to hypoxia (n = 1).

**eTable 4. Subgroup analyses of disease-free survival (patients with a pregnancy vs. patients with no pregnancy).**

| <i>Extended Cox model analysis</i>   |                                       |                               |                    |                                 |                   |
|--------------------------------------|---------------------------------------|-------------------------------|--------------------|---------------------------------|-------------------|
| <b>Variables</b>                     | <b>No. of patients/N o. of events</b> | <b>Univariate HR (95% CI)</b> | <b>P value</b>     | <b>Multivariate HR (95% CI)</b> | <b>P value</b>    |
| <b>Study group</b>                   | 4732/1683                             | 0.97 (0.82-1.15)              | .74                | 0.99 (0.81-1.20)                | .90               |
| <b>Specific BRCA gene</b>            |                                       |                               | <.001 <sup>a</sup> |                                 | .007 <sup>a</sup> |
| <i>BRCA1</i>                         | 3033/1101                             | 0.79 (0.64-0.97)              |                    | 0.80 (0.63-1.01)                |                   |
| <i>BRCA2</i>                         | 1663/569                              | 1.61 (1.22-2.12)              |                    | 1.55 (1.12-2.16)                |                   |
| <i>BRCA1 and BRCA2</i>               | 26/11                                 | 1.82 (0.33-10.1)              |                    | 4.49 (0.28-72.17)               |                   |
| <i>BRCA, unknown if 1 or 2 types</i> | 10/2                                  | 1.11 (0.05-23.2)              |                    | NE                              |                   |
| <b>Hormone receptor status</b>       |                                       |                               | .04 <sup>a</sup>   |                                 | .009 <sup>a</sup> |
| Positive                             | 2126/715                              | 1.29 (0.98-1.70)              |                    | 1.30 (0.95-1.76)                |                   |
| Negative                             | 2529/951                              | 0.82 (0.67-1.01)              |                    | 0.76 (0.60-0.95)                |                   |
| Unknown                              | 77/17                                 | 1.08 (0.25-4.74)              |                    | 0.28 (0.04-2.21)                |                   |
| <b>ERBB2 status</b>                  |                                       |                               | .30 <sup>a</sup>   |                                 | .08 <sup>a</sup>  |
| Positive                             | 339/111                               | 0.66 (0.24-1.80)              |                    | 0.61 (0.22-1.71)                |                   |
| Negative                             | 4151/1471                             | 1.01 (0.85-1.21)              |                    | 1.07 (0.87-1.31)                |                   |
| Unknown                              | 242/101                               | 0.61 (0.30-1.26)              |                    | 0.42 (0.17-1.02)                |                   |
| <b>Chemotherapy</b>                  |                                       |                               | .31 <sup>a</sup>   |                                 | .47 <sup>a</sup>  |
| No chemotherapy                      | 381/138                               | 1.06 (0.61-1.87)              |                    | 0.77 (0.39-1.52)                |                   |
| (Neo)adjuvant chemotherapy           | 4319/1534                             | 0.97 (0.82-1.16)              |                    | 1.00 (0.82-1.23)                |                   |
| Unknown                              | 32/11                                 | NE                            |                    | 0.77 (0.39-1.52)                |                   |
| <b>Endocrine therapy</b>             |                                       |                               | .02 <sup>a</sup>   |                                 | .01 <sup>a</sup>  |
| No endocrine therapy                 | 2640/998                              | 0.82 (0.67-1.01)              |                    | 0.85 (0.67-1.08)                |                   |
| Endocrine therapy                    | 1987/659                              | 1.35 (1.01-1.81)              |                    | 1.55 (1.08-2.21)                |                   |
| Unknown                              | 105/26                                | 0.77 (0.18-3.23)              |                    | 0.13 (0.01-2.95)                |                   |
| <i>Secondary matched analysis</i>    |                                       |                               |                    |                                 |                   |
| <b>Variables</b>                     | <b>No. of patients/N o. of events</b> | <b>Univariate HR (95% CI)</b> | <b>P value</b>     |                                 |                   |
| <b>Study group</b>                   | 2452/838                              | 0.63 (0.53-0.74)              | <.001              |                                 |                   |
| <b>Specific BRCA gene</b>            |                                       |                               | <.001 <sup>a</sup> |                                 |                   |
| <i>BRCA1</i>                         | 1804/623                              | 0.51 (0.41-0.62)              |                    |                                 |                   |
| <i>BRCA2</i>                         | 644/211                               | 1.07 (0.79-1.45)              |                    |                                 |                   |
| <i>BRCA1 and BRCA2</i>               | 4/4                                   | 3.49 (0.36-33.67)             |                    |                                 |                   |
| <b>Hormone receptor status</b>       |                                       |                               | .04 <sup>a</sup>   |                                 |                   |
| Positive                             | 816/254                               | 0.81 (0.60-1.09)              |                    |                                 |                   |
| Negative                             | 1636/584                              | 0.55 (0.45-0.68)              |                    |                                 |                   |
| <b>ERBB2 status</b>                  |                                       |                               | .41 <sup>a</sup>   |                                 |                   |
| Positive                             | 151/44                                | 0.47 (0.17-1.31)              |                    |                                 |                   |
| Negative                             | 2157/736                              | 0.65 (0.54-0.78)              |                    |                                 |                   |
| Unknown                              | 144/58                                | 0.40 (0.19-0.85)              |                    |                                 |                   |
| <b>Chemotherapy</b>                  |                                       |                               | .59 <sup>a</sup>   |                                 |                   |



|                            |          |                   |                  |  |  |
|----------------------------|----------|-------------------|------------------|--|--|
| No chemotherapy            | 180/59   | 0.82 (0.45-1.51)  |                  |  |  |
| (Neo)adjuvant chemotherapy | 2259/772 | 0.62 (0.52-0.74)  |                  |  |  |
| Unknown                    | 13/7     | 1.36 (0.08-23.68) |                  |  |  |
| <b>Endocrine therapy</b>   |          |                   | .15 <sup>a</sup> |  |  |
| No endocrine therapy       | 1687/598 | 0.56 (0.46-0.69)  |                  |  |  |
| Endocrine therapy          | 759/239  | 0.81 (0.60-1.11)  |                  |  |  |
| Unknown                    | 6/1      | NE                |                  |  |  |

<sup>a</sup> P value for interaction

Abbreviations: HR, hazard ratio; CI, confidence intervals; NE, not evaluable.

**eTable 5. Subgroup analyses of breast cancer-specific survival (patients with a pregnancy vs. patients with no pregnancy).**

| <i>Extended Cox model analysis</i> |                                      |                               |                   |                                 |                  |
|------------------------------------|--------------------------------------|-------------------------------|-------------------|---------------------------------|------------------|
| <b>Variables</b>                   | <b>No. of patients/No. of events</b> | <b>Univariate HR (95% CI)</b> | <b>P value</b>    | <b>Multivariate HR (95% CI)</b> | <b>P value</b>   |
| <b>Study group</b>                 | 4732/558                             | 0.53 (0.37-0.74)              | <.001             | 0.60 (0.40-0.88)                | .009             |
| <b>Specific BRCA gene</b>          |                                      |                               | .007 <sup>a</sup> |                                 | .19 <sup>a</sup> |
| BRCA1                              | 3033/357                             | 0.35 (0.21-0.56)              |                   | 0.44 (0.26-0.73)                |                  |
| BRCA2                              | 1663/195                             | 1.17 (0.71-1.93)              |                   | 1.02 (0.57-1.81)                |                  |
| BRCA1 and BRCA2                    | 26/5                                 | NE                            |                   | NE                              |                  |
| BRCA, unknown if 1 or 2 types      | 10/1                                 | NE                            |                   | NE                              |                  |
| <b>Hormone receptor status</b>     |                                      |                               | .24 <sup>a</sup>  |                                 | .30 <sup>a</sup> |
| Positive                           | 2126/247                             | 0.78 (0.46-1.35)              |                   | 0.80 (0.44-1.45)                |                  |
| Negative                           | 2529/307                             | 0.43 (0.27-0.67)              |                   | 0.44 (0.28-0.71)                |                  |
| Unknown                            | 77/4                                 | NE                            |                   | NE                              |                  |
| <b>ERBB2 status</b>                |                                      |                               | .89 <sup>a</sup>  |                                 | .98 <sup>a</sup> |
| Positive                           | 339/40                               | 0.74 (0.18-3.08)              |                   | 0.52 (0.11-2.36)                |                  |
| Negative                           | 4151/487                             | 0.52 (0.36-0.74)              |                   | 0.60 (0.40-0.91)                |                  |
| Unknown                            | 242/31                               | 0.51 (0.12-2.13)              |                   | 0.59 (0.12-2.97)                |                  |
| <b>Chemotherapy</b>                |                                      |                               | .89 <sup>a</sup>  |                                 | .36 <sup>a</sup> |
| No chemotherapy                    | 381/37                               | 0.69 (0.21-2.26)              |                   | 1.08 (0.30-3.91)                |                  |
| (Neo)adjuvant chemotherapy         | 4319/518                             | 0.51 (0.36-0.74)              |                   | 0.57 (0.38-0.86)                |                  |
| Unknown                            | 32/3                                 | NE                            |                   | NE                              |                  |
| <b>Endocrine therapy</b>           |                                      |                               | .22 <sup>a</sup>  |                                 | .99 <sup>a</sup> |
| No endocrine therapy               | 2640/320                             | 0.43 (0.28-0.67)              |                   | 0.59 (0.36-0.95)                |                  |
| Endocrine therapy                  | 1987/231                             | 0.81 (0.46-1.43)              |                   | 0.63 (0.33-1.20)                |                  |
| Unknown                            | 105/7                                | NE                            |                   | NE                              |                  |
| <i>Secondary matched analysis</i>  |                                      |                               |                   |                                 |                  |
| <b>Variables</b>                   | <b>No. of patients/No. of events</b> | <b>Univariate HR (95% CI)</b> | <b>P value</b>    |                                 |                  |
| <b>Study group</b>                 | 2452/233                             | 0.43 (0.30-0.63)              | <.001             |                                 |                  |
| <b>Specific BRCA gene</b>          |                                      |                               | .04 <sup>a</sup>  |                                 |                  |
| BRCA1                              | 1804/165                             | 0.30 (0.18-0.50)              |                   |                                 |                  |
| BRCA2                              | 644/68                               | 0.83 (0.47-1.46)              |                   |                                 |                  |
| BRCA1 and BRCA2                    | 4/0                                  | NE                            |                   |                                 |                  |
| <b>Hormone receptor status</b>     |                                      |                               | .31 <sup>a</sup>  |                                 |                  |
| Positive                           | 816/75                               | 0.57 (0.31-1.05)              |                   |                                 |                  |
| Negative                           | 1636/158                             | 0.38 (0.23-0.61)              |                   |                                 |                  |
| <b>ERBB2 status</b>                |                                      |                               | .57 <sup>a</sup>  |                                 |                  |
| Positive                           | 151/13                               | 0.39 (0.05-3.03)              |                   |                                 |                  |
| Negative                           | 2157/200                             | 0.46 (0.31-0.69)              |                   |                                 |                  |
| Unknown                            | 144/20                               | 0.15 (0.02-1.14)              |                   |                                 |                  |
| <b>Chemotherapy</b>                |                                      |                               | .30 <sup>a</sup>  |                                 |                  |

|                            |          |                  |                  |  |  |
|----------------------------|----------|------------------|------------------|--|--|
| No chemotherapy            | 180/21   | 0.53 (0.17-1.66) |                  |  |  |
| (Neo)adjuvant chemotherapy | 2259/210 | 0.44 (0.29-0.65) |                  |  |  |
| Unknown                    | 13/2     | NE               |                  |  |  |
| <b>Endocrine therapy</b>   |          |                  | .34 <sup>a</sup> |  |  |
| No endocrine               | 1687/161 | 0.37 (0.23-0.60) |                  |  |  |
| Endocrine therapy          | 759/71   | 0.65 (0.35-1.20) |                  |  |  |
| Unknown                    | 6/1      | NE               |                  |  |  |

<sup>a</sup> P value for interaction

Abbreviations: HR, hazard ratio; CI, confidence intervals; NE, not evaluable.

**eTable 6. Subgroup analyses of overall survival (patients with a pregnancy vs. patients with no pregnancy).**

| <i>Extended Cox model analysis</i> |                                      |                               |                   |                                 |                  |
|------------------------------------|--------------------------------------|-------------------------------|-------------------|---------------------------------|------------------|
| <b>Variables</b>                   | <b>No. of patients/No. of events</b> | <b>Univariate HR (95% CI)</b> | <b>P value</b>    | <b>Multivariate HR (95% CI)</b> | <b>P value</b>   |
| <b>Study group</b>                 | 4732/609                             | 0.52 (0.38-0.72)              | <.001             | 0.58 (0.40-0.85)                | .005             |
| <b>Specific BRCA gene</b>          |                                      |                               | .004 <sup>a</sup> |                                 | .13 <sup>a</sup> |
| BRCA1                              | 3033/386                             | 0.35 (0.23-0.56)              |                   | 0.42 (0.26-0.68)                |                  |
| BRCA2                              | 1663/217                             | 1.16 (0.73-1.86)              |                   | 1.00 (0.58-1.72)                |                  |
| BRCA1 and BRCA2                    | 26/5                                 | 0.66 (0.04-11.99)             |                   | NE                              |                  |
| BRCA, unknown if 1 or 2 types      | 10/1                                 | 1.45 (0.06-35.87)             |                   | NE                              |                  |
| <b>Hormone receptor status</b>     |                                      |                               | .16 <sup>a</sup>  |                                 | .24 <sup>a</sup> |
| Positive                           | 2126/270                             | 0.81 (0.49-1.35)              |                   | 0.78 (0.44-1.38)                |                  |
| Negative                           | 2529/334                             | 0.43 (0.28-0.66)              |                   | 0.43 (0.27-0.66)                |                  |
| Unknown                            | 77/5                                 | 0.53 (0.03-9.63)              |                   | NE                              |                  |
| <b>ERBB2 status</b>                |                                      |                               | .47 <sup>a</sup>  |                                 | .92 <sup>a</sup> |
| Positive                           | 339/43                               | 1.04 (0.32-3.35)              |                   | 0.73 (0.21-2.60)                |                  |
| Negative                           | 4151/527                             | 0.51 (0.36-0.72)              |                   | 0.56 (0.38-0.83)                |                  |
| Unknown                            | 242/39                               | 0.39 (0.09-1.60)              |                   | 0.62 (0.13-3.02)                |                  |
| <b>Chemotherapy</b>                |                                      |                               | .97 <sup>a</sup>  |                                 | .49 <sup>a</sup> |
| No chemotherapy                    | 381/41                               | 0.60 (0.19-1.95)              |                   | 0.90 (0.25-3.24)                |                  |
| (Neo)adjuvant chemotherapy         | 4319/563                             | 0.52 (0.37-0.73)              |                   | 0.56 (0.38-0.82)                |                  |
| Unknown                            | 32/5                                 | NE                            |                   | NE                              |                  |
| <b>Endocrine therapy</b>           |                                      |                               | .23 <sup>a</sup>  |                                 | .99 <sup>a</sup> |
| No endocrine therapy               | 2640/350                             | 0.45 (0.30-0.68)              |                   | 0.57 (0.36-0.90)                |                  |
| Endocrine therapy                  | 1987/251                             | 0.80 (0.47-1.37)              |                   | 0.59 (0.31-1.13)                |                  |
| Unknown                            | 105/8                                | 0.39 (0.02-6.86)              |                   | NE                              |                  |
| <i>Secondary matched analysis</i>  |                                      |                               |                   |                                 |                  |
| <b>Variables</b>                   | <b>No. of patients/No. of events</b> | <b>Univariate HR (95% CI)</b> | <b>P value</b>    |                                 |                  |
| <b>Study group</b>                 | 2452/258                             | 0.43 (0.30-0.61)              | <.001             |                                 |                  |
| <b>Specific BRCA gene</b>          |                                      |                               | .02 <sup>a</sup>  |                                 |                  |
| BRCA1                              | 1804/180                             | 0.29 (0.18-0.48)              |                   |                                 |                  |
| BRCA2                              | 644/78                               | 0.81 (0.48-1.39)              |                   |                                 |                  |
| BRCA1 and BRCA2                    | 4/0                                  | NE                            |                   |                                 |                  |
| <b>Hormone receptor status</b>     |                                      |                               | .29 <sup>a</sup>  |                                 |                  |
| Positive                           | 816/82                               | 0.56 (0.31-1.01)              |                   |                                 |                  |
| Negative                           | 1636/176                             | 0.37 (0.24-0.59)              |                   |                                 |                  |
| <b>ERBB2 status</b>                |                                      |                               | .51 <sup>a</sup>  |                                 |                  |
| Positive                           | 151/13                               | 0.40 (0.05-3.07)              |                   |                                 |                  |
| Negative                           | 2157/223                             | 0.46 (0.31-0.66)              |                   |                                 |                  |
| Unknown                            | 144/22                               | 0.14 (0.02-1.02)              |                   |                                 |                  |
| <b>Chemotherapy</b>                |                                      |                               | .47 <sup>a</sup>  |                                 |                  |

|                            |          |                   |                  |  |  |
|----------------------------|----------|-------------------|------------------|--|--|
| No chemotherapy            | 180/23   | 0.47 (0.15-1.47)  |                  |  |  |
| (Neo)adjuvant chemotherapy | 2259/231 | 0.44 (0.30-0.64)  |                  |  |  |
| Unknown                    | 13/4     | 2.83 (0.15-54.14) |                  |  |  |
| <b>Endocrine therapy</b>   |          |                   | .49 <sup>a</sup> |  |  |
| No endocrine therapy       | 1687/180 | 0.38 (0.25-0.60)  |                  |  |  |
| Endocrine therapy          | 759/77   | 0.59 (0.32-1.08)  |                  |  |  |
| Unknown                    | 6/1      | NE                |                  |  |  |

<sup>a</sup> P value for interaction

Abbreviations: HR, hazard ratio; CI, confidence intervals; NE, not evaluable.

**eTable 7. Impact of the interval between diagnosis and pregnancy, outcome of pregnancy, and breastfeeding status on disease-free survival (patients with a pregnancy vs. patients with no pregnancy).**

| <i>Secondary matched analysis</i>                        |                                      |                               |                            |
|----------------------------------------------------------|--------------------------------------|-------------------------------|----------------------------|
| <b>Variables</b>                                         | <b>No. of patients/No. of events</b> | <b>Univariate HR (95% CI)</b> | <b>P value<sup>a</sup></b> |
| <b>Pregnancy interval</b>                                |                                      |                               | .24                        |
| ≤ 2 years                                                | 512/216                              | 0.52 (0.37-0.73)              |                            |
| > 2 years                                                | 1940/622                             | 0.66 (0.54-0.80)              |                            |
| <b>Pregnancy outcome</b>                                 |                                      |                               | .25                        |
| Abortion/miscarriage                                     | 388/145                              | 0.49 (0.32-0.76)              |                            |
| Completed pregnancy                                      | 1944/667                             | 0.65 (0.54-0.79)              |                            |
| <b>Breastfeeding</b>                                     |                                      |                               | .15                        |
| Not applicable (pregnancy not completed/ongoing)/unknown | 804/289                              | 0.68 (0.51-0.91)              |                            |
| Breastfed                                                | 504/209                              | 0.76 (0.55-1.05)              |                            |
| No breastfeeding                                         | 1024/314                             | 0.50 (0.37-0.67)              |                            |

Abbreviations: HR, hazard ratio; CI, confidence intervals.

<sup>a</sup> P value for interaction

**eTable 8. Impact of the interval between diagnosis and pregnancy, outcome of pregnancy, and breastfeeding status on breast cancer-specific survival (patients with a pregnancy vs. patients with no pregnancy).**

| <i>Secondary matched analysis</i>                        |                                      |                               |                            |
|----------------------------------------------------------|--------------------------------------|-------------------------------|----------------------------|
| <b>Variables</b>                                         | <b>No. of patients/No. of events</b> | <b>Univariate HR (95% CI)</b> | <b>P value<sup>a</sup></b> |
| <b>Pregnancy interval</b>                                |                                      |                               | .32                        |
| ≤ 2 years                                                | 512/95                               | 0.34 (0.18-0.63)              |                            |
| > 2 years                                                | 1940/138                             | 0.50 (0.31-0.80)              |                            |
| <b>Pregnancy outcome</b>                                 |                                      |                               | .95                        |
| Abortion/miscarriage                                     | 388/61                               | 0.45 (0.22-0.93)              |                            |
| Completed pregnancy                                      | 1944/165                             | 0.44 (0.28-0.68)              |                            |
| <b>Breastfeeding</b>                                     |                                      |                               | .63                        |
| Not applicable (pregnancy not completed/ongoing)/unknown | 804/91                               | 0.54 (0.30-0.94)              |                            |
| Breastfed                                                | 504/58                               | 0.45 (0.22-0.93)              |                            |
| No breastfeeding                                         | 1024/77                              | 0.34 (0.17-0.70)              |                            |

Abbreviations: HR, hazard ratio; CI, confidence intervals.

<sup>a</sup> P value for interaction

**eTable 9. Impact of the interval between diagnosis and pregnancy, outcome of pregnancy, and breastfeeding status on overall survival (patients with a pregnancy vs. patients with no pregnancy).**

| <i>Secondary matched analysis</i>                        |                                      |                               |                            |
|----------------------------------------------------------|--------------------------------------|-------------------------------|----------------------------|
| <b>Variables</b>                                         | <b>No. of patients/No. of events</b> | <b>Univariate HR (95% CI)</b> | <b>P value<sup>a</sup></b> |
| <b>Pregnancy interval</b>                                |                                      |                               | .43                        |
| ≤ 2 years                                                | 512/99                               | 0.35 (0.19-0.64)              |                            |
| > 2 years                                                | 1940/159                             | 0.47 (0.30-0.74)              |                            |
| <b>Pregnancy outcome</b>                                 |                                      |                               | .91                        |
| Abortion/miscarriage                                     | 388/65                               | 0.42 (0.20-0.86)              |                            |
| Completed pregnancy                                      | 1944/186                             | 0.44 (0.29-0.67)              |                            |
| <b>Breastfeeding</b>                                     |                                      |                               | .63                        |
| Not applicable (pregnancy not completed/ongoing)/unknown | 804/98                               | 0.49 (0.28-0.86)              |                            |
| Breastfed                                                | 504/65                               | 0.50 (0.26-0.98)              |                            |
| No breastfeeding                                         | 1024/88                              | 0.33 (0.17-0.66)              |                            |

Abbreviations: HR, hazard ratio; CI, confidence intervals.

<sup>a</sup> P value for interaction



**eFigure1. Prognostic impact of pregnancy after breast cancer in young *BRCA* carriers in the secondary matched analysis: disease-free survival.**

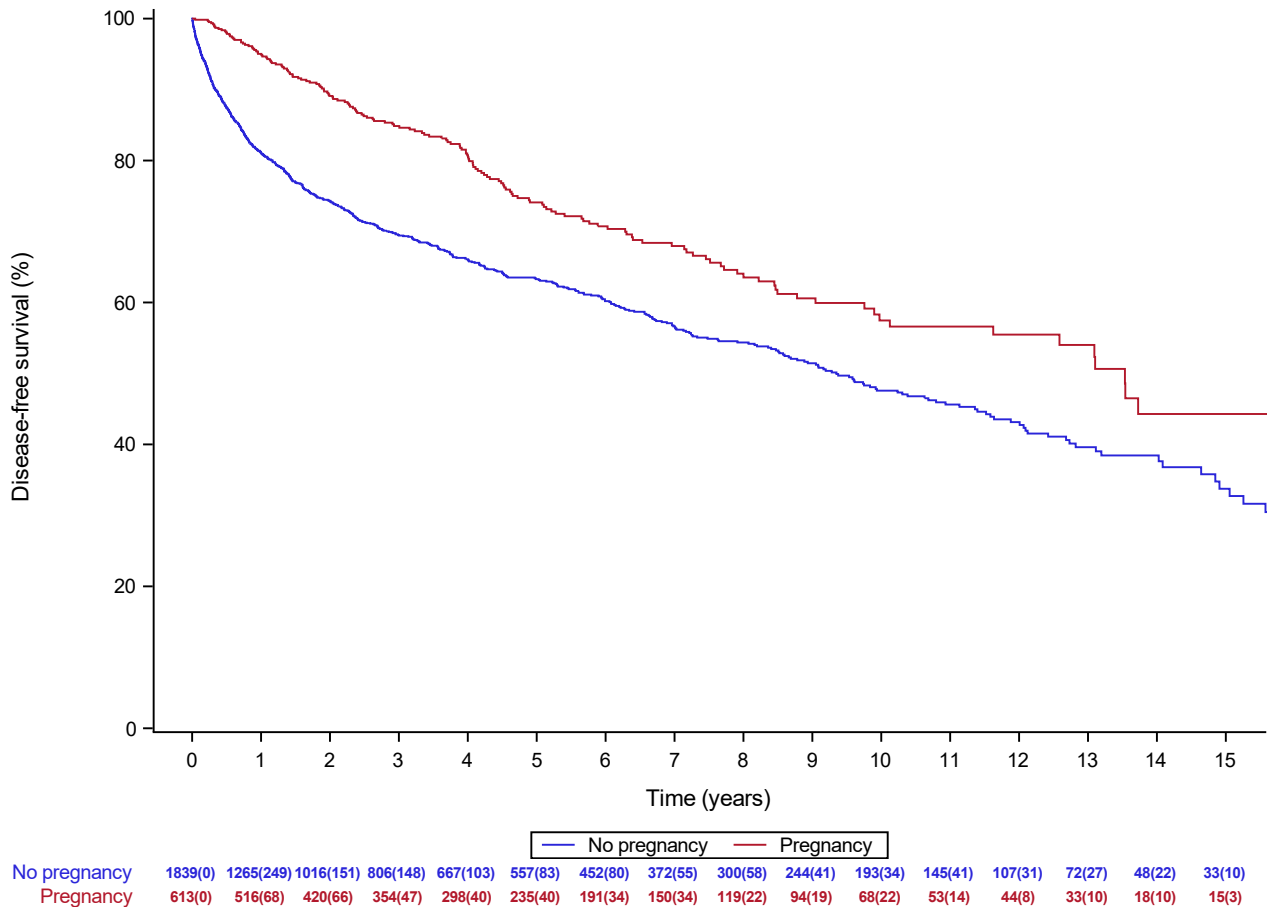

**eFigure2. Prognostic impact of pregnancy after breast cancer in young *BRCA* carriers in the secondary matched analysis: breast cancer-specific survival.**

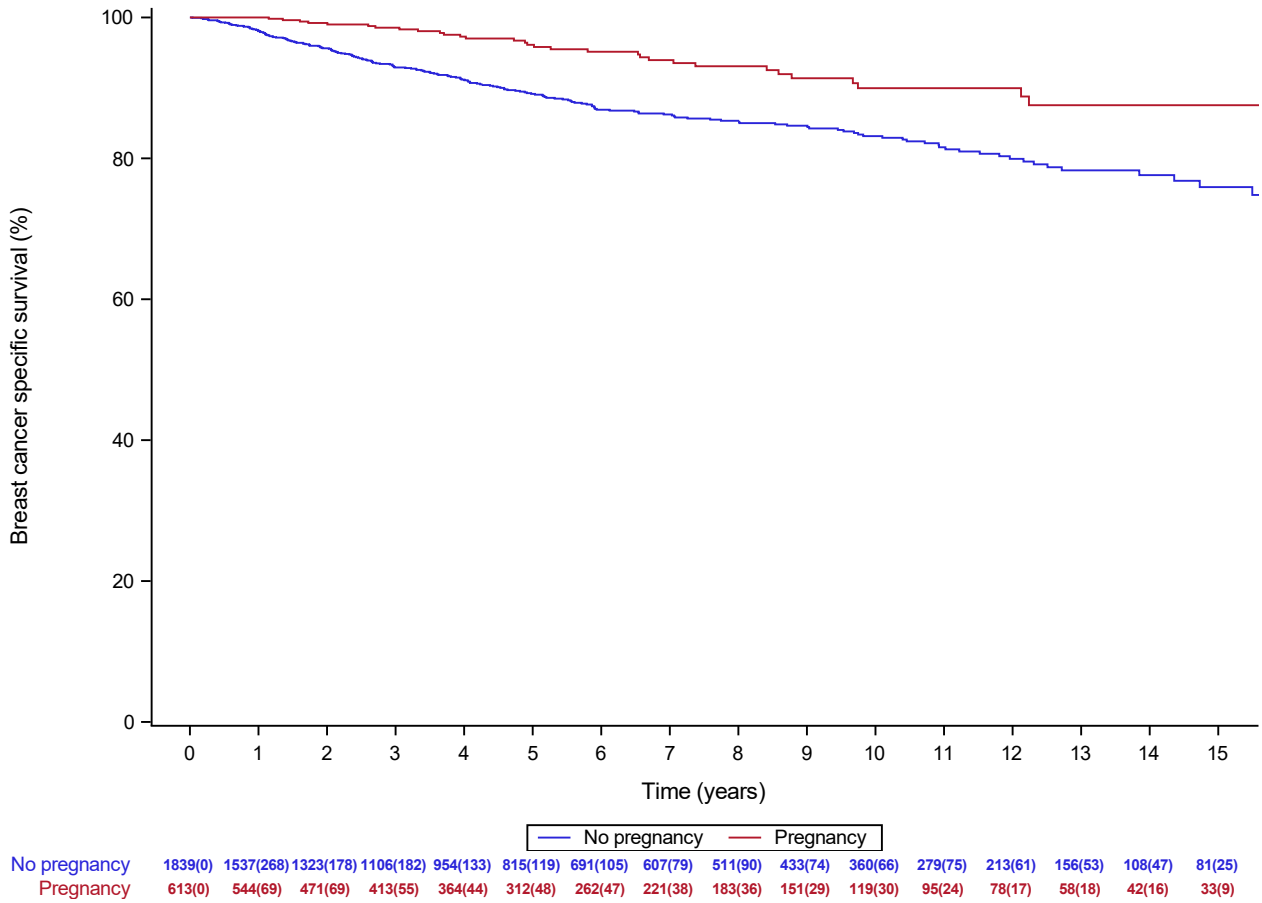

**eFigure3. Prognostic impact of pregnancy after breast cancer in young *BRCA* carriers in the secondary matched analysis: overall survival.**

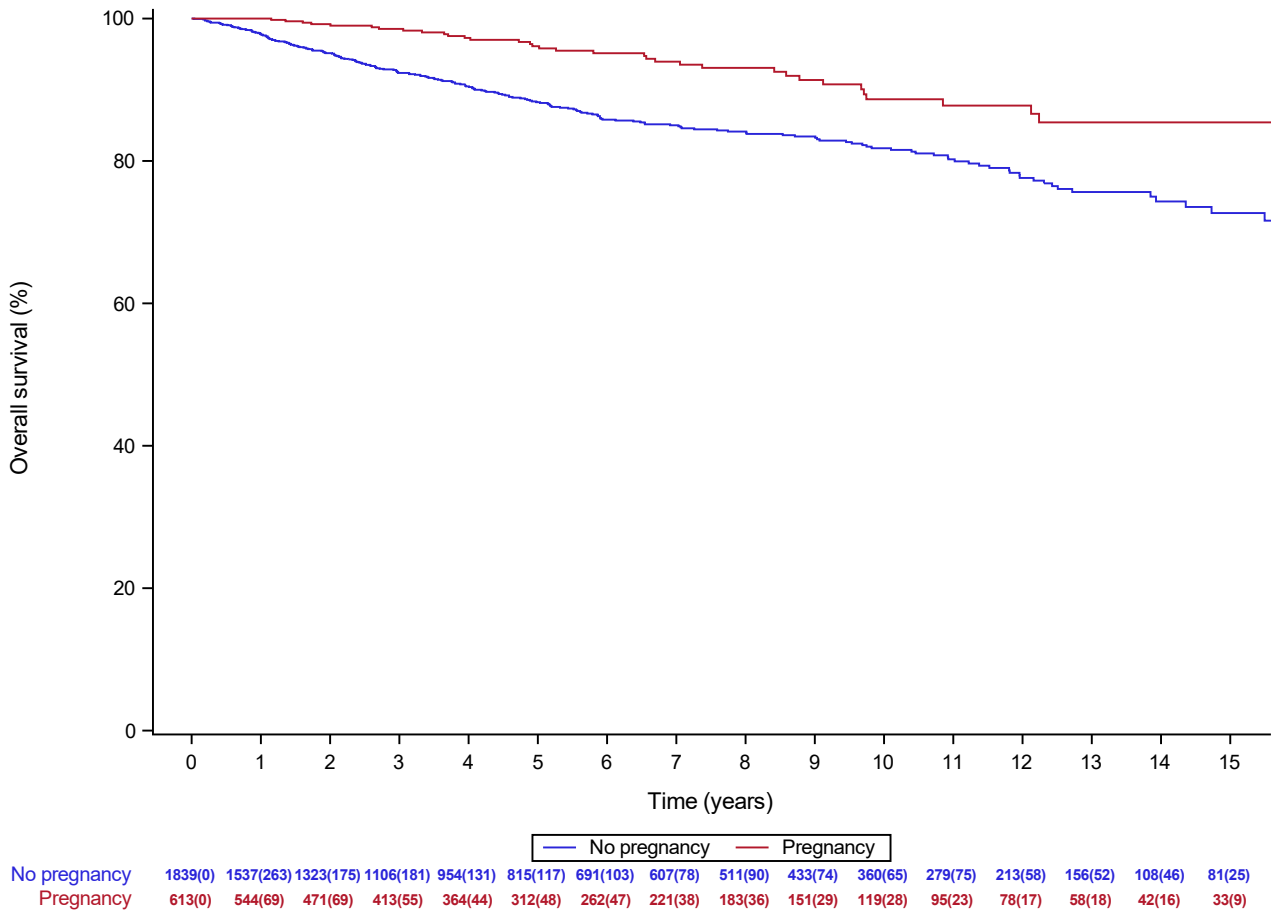

Supplement: jama-e2325463-s002.pdf [file jama-e2325463-s002.pdf]
