# Supplementary material
Source: PubMed Central journal article supplement (PMC10704340)
Supplement: jama-e2325463-s003.pdf [file jama-e2325463-s003.pdf]

\*First name, last name, and suffix (if applicable) are required and will appear in PubMed.

| <b>*Group Name(s): BRCA BCY Collaboration</b> |                   |                              |                  |                                                  |                                          |                                                         |                                                                                            |
|-----------------------------------------------|-------------------|------------------------------|------------------|--------------------------------------------------|------------------------------------------|---------------------------------------------------------|--------------------------------------------------------------------------------------------|
| <b>*First Name and Middle Initial(s)</b>      | <b>*Last Name</b> | <b>*Suffix (eg, Jr, III)</b> | Academic Degrees | Institution                                      | Location (city, state/province, country) | Role or Contribution, eg, chair, principal investigator | Group (if more than 1 Group listed in the byline) and/or Subgroup (eg, Steering Committee) |
| Evandro                                       | de Azambuja       |                              |                  | Institut Jules Bordet                            |                                          |                                                         |                                                                                            |
| Chiara                                        | Molinelli         |                              |                  | Institut Jules Bordet                            |                                          |                                                         |                                                                                            |
| Marianne                                      | Paesmans          |                              |                  | Institut Jules Bordet                            |                                          |                                                         |                                                                                            |
| Lieveke                                       | Ameye             |                              |                  | Institut Jules Bordet                            |                                          |                                                         |                                                                                            |
| Frédéric                                      | Amant             |                              |                  | University Hospitals Leuven                      |                                          |                                                         |                                                                                            |
| Hilde                                         | Brems             |                              |                  | University Hospitals Leuven                      |                                          |                                                         |                                                                                            |
| Sileny                                        | Han               |                              |                  | University Hospitals Leuven                      |                                          |                                                         |                                                                                            |
| Sigrid                                        | Hatse             |                              |                  | University Hospitals Leuven                      |                                          |                                                         |                                                                                            |
| Ines                                          | Nevelsteen        |                              |                  | University Hospitals Leuven                      |                                          |                                                         |                                                                                            |
| Patrick                                       | Neven             |                              |                  | University Hospitals Leuven                      |                                          |                                                         |                                                                                            |
| Ann                                           | Smeets            |                              |                  | University Hospitals Leuven                      |                                          |                                                         |                                                                                            |
| Chantal                                       | Van Rompuy        |                              |                  | University Hospitals Leuven                      |                                          |                                                         |                                                                                            |
| Hans                                          | Wildiers          |                              |                  | University Hospitals Leuven                      |                                          |                                                         |                                                                                            |
| Francois                                      | Duhoux            |                              |                  | Cliniques Universitaires Saint-Luc<br>ULB        |                                          |                                                         |                                                                                            |
| Federica                                      | Giugliano         |                              |                  | European Institute of Oncology<br>(IEO)          |                                          |                                                         |                                                                                            |
| Carmen                                        | Criscitello       |                              |                  | European Institute of Oncology<br>(IEO)          |                                          |                                                         |                                                                                            |
| Roberto                                       | Borea             |                              |                  | IRCCS Ospedale Policlinico San<br>Martino        |                                          |                                                         |                                                                                            |
| Luca                                          | Arecco            |                              |                  | IRCCS Ospedale Policlinico San<br>Martino        |                                          |                                                         |                                                                                            |
| Alessandra                                    | Chirco            |                              |                  | Azienda Ospedaliera "Papa Giovanni<br>XXIII"     |                                          |                                                         |                                                                                            |
| Federica                                      | Bini              |                              |                  | Azienda Ospedaliera "Papa Giovanni<br>XXIII"     |                                          |                                                         |                                                                                            |
| Marta                                         | Venturelli        |                              |                  | Azienda Ospedaliero-Universitaria<br>Policlinico |                                          |                                                         |                                                                                            |

## Supplemental Online Content: Nonauthor Collaborators

\*First name, last name, and suffix (if applicable) are required and will appear in PubMed.

| *First Name and Middle Initial(s) | *Last Name       | *Suffix (eg, Jr, III) | Academic Degrees | Institution                                                               | Location (city, state/province, country) | Role or Contribution, eg, chair, principal investigator | Group (if more than 1 Group listed in the byline) and/or Subgroup (eg, Steering Committee) |
|-----------------------------------|------------------|-----------------------|------------------|---------------------------------------------------------------------------|------------------------------------------|---------------------------------------------------------|--------------------------------------------------------------------------------------------|
| Laura                             | Cortesi          |                       |                  | Azienda Ospedaliero-Universitaria Policlinico                             |                                          |                                                         |                                                                                            |
| Riccardo                          | Ponzone          |                       |                  | Candiolo Cancer Center (IRCCS)                                            |                                          |                                                         |                                                                                            |
| Nicoletta                         | Tomasi Cont      |                       |                  | Candiolo Cancer Center (IRCCS)                                            |                                          |                                                         |                                                                                            |
| Judith                            | Balmaña          |                       |                  | Vall D'Hebron University Hospital                                         |                                          |                                                         |                                                                                            |
| Rossella                          | Graffeo          |                       |                  | Oncology Institute of Southern Switzerland (IOSI)                         |                                          |                                                         |                                                                                            |
| Helena                            | Luna Pais        |                       |                  | Hospital de Santa Maria – University of Lisbon                            |                                          |                                                         |                                                                                            |
| Alejandro                         | Mohar            |                       |                  | Instituto Nacional de Cancerologia                                        |                                          |                                                         |                                                                                            |
| Tamara                            | Palacios         |                       |                  | Instituto Nacional de Cancerologia                                        |                                          |                                                         |                                                                                            |
| Lucia                             | Da Ros           |                       |                  | Oncological Center CRO Aviano                                             |                                          |                                                         |                                                                                            |
| Gianmaria                         | Miolo            |                       |                  | Oncological Center CRO Aviano                                             |                                          |                                                         |                                                                                            |
| Mattia                            | Garutti          |                       |                  | Oncological Center CRO Aviano                                             |                                          |                                                         |                                                                                            |
| Brenno                            | Pastò            |                       |                  | Oncological Center CRO Aviano                                             |                                          |                                                         |                                                                                            |
| Simon                             | Spazzapan        |                       |                  | Oncological Center CRO Aviano                                             |                                          |                                                         |                                                                                            |
| Alessandra                        | Viel             |                       |                  | Oncological Center CRO Aviano                                             |                                          |                                                         |                                                                                            |
| Alejandro                         | Pérez-Fidalgo    |                       |                  | INCLIVA, University Hospital of Valencia                                  |                                          |                                                         |                                                                                            |
| Renata                            | Colombo Bonadio  |                       |                  | Cancer Institute ICESP                                                    |                                          |                                                         |                                                                                            |
| Tamar                             | Peretz-Yablonski |                       |                  | Sharett Institute of Oncology - Hadassah Hebrew University Medical Center |                                          |                                                         |                                                                                            |
| Chiara Annunziata Pasqualina      | Anghelone        |                       |                  | IRCCS Policlinico San Matteo                                              |                                          |                                                         |                                                                                            |
| Angelica                          | Della Valle      |                       |                  | IRCCS Policlinico San Matteo                                              |                                          |                                                         |                                                                                            |
| Maria                             | Campanella       |                       |                  | IRCCS Policlinico San Matteo                                              |                                          |                                                         |                                                                                            |
| Valentina                         | Guarneri         |                       |                  | Istituto Oncologico Veneto - IOV                                          |                                          |                                                         |                                                                                            |
| Raphaelle                         | Bas              |                       |                  | Institut Curie                                                            |                                          |                                                         |                                                                                            |
| Pierre-Etienne                    | Heudel           |                       |                  | Leon Berard Cancer Center                                                 |                                          |                                                         |                                                                                            |

## Supplemental Online Content: Nonauthor Collaborators

\*First name, last name, and suffix (if applicable) are required and will appear in PubMed.

| *First Name and Middle Initial(s) | *Last Name     | *Suffix (eg, Jr, III) | Academic Degrees | Institution                                                                                    | Location (city, state/province, country) | Role or Contribution, eg, chair, principal investigator | Group (if more than 1 Group listed in the byline) and/or Subgroup (eg, Steering Committee) |
|-----------------------------------|----------------|-----------------------|------------------|------------------------------------------------------------------------------------------------|------------------------------------------|---------------------------------------------------------|--------------------------------------------------------------------------------------------|
| Olivier                           | Tredan         |                       |                  | Leon Berard Cancer Center                                                                      |                                          |                                                         |                                                                                            |
| Solenne                           | de Talouet     |                       |                  | Leon Berard Cancer Center                                                                      |                                          |                                                         |                                                                                            |
| Valérie                           | Bonadona       |                       |                  | Leon Berard Cancer Center                                                                      |                                          |                                                         |                                                                                            |
| Christine                         | Lasset         |                       |                  | Leon Berard Cancer Center                                                                      |                                          |                                                         |                                                                                            |
| Marion                            | Acheritogaray  |                       |                  | Bergonie Institute                                                                             |                                          |                                                         |                                                                                            |
| Claire                            | Senechal       |                       |                  | Bergonie Institute                                                                             |                                          |                                                         |                                                                                            |
| Monica                            | Mariño         |                       |                  | Hospital Universitari Son Espases Palma                                                        |                                          |                                                         |                                                                                            |
| Octavi                            | Córdoba        |                       |                  | Hospital Universitari Son Espases Palma                                                        |                                          |                                                         |                                                                                            |
| Didi                              | Feldman        |                       |                  | Tel Aviv Sourasky Medical Center                                                               |                                          |                                                         |                                                                                            |
| Romina I.                         | Pesce          |                       |                  | Hospital Italiano de Buenos Aires                                                              |                                          |                                                         |                                                                                            |
| Carol                             | Allemand       |                       |                  | Hospital Italiano de Buenos Aires                                                              |                                          |                                                         |                                                                                            |
| Cecilia                           | Riggi          |                       |                  | Hospital Italiano de Buenos Aires                                                              |                                          |                                                         |                                                                                            |
| Maria Belen                       | Iriarte        |                       |                  | Hospital Italiano de Buenos Aires                                                              |                                          |                                                         |                                                                                            |
| Alfonso                           | Cortés Salgado |                       |                  | Ramon y Cajal - IOB Institute of Oncology (Madrid) - International Breast Cancer Center (IBCC) |                                          |                                                         |                                                                                            |
| Javier                            | Cortes         |                       |                  | Ramon y Cajal - IOB Institute of Oncology (Madrid) - International Breast Cancer Center (IBCC) |                                          |                                                         |                                                                                            |
| María                             | Gion           |                       |                  | Ramon y Cajal - IOB Institute of Oncology (Madrid) - International Breast Cancer Center (IBCC) |                                          |                                                         |                                                                                            |
| Cristina                          | Saavedra       |                       |                  | Ramon y Cajal - IOB Institute of Oncology (Madrid) - International Breast Cancer Center (IBCC) |                                          |                                                         |                                                                                            |
| Adela                             | Rodriguez      |                       |                  | Hospital Clínic of Barcelona                                                                   |                                          |                                                         |                                                                                            |
| Barbara                           | Adamo          |                       |                  | Hospital Clínic of Barcelona                                                                   |                                          |                                                         |                                                                                            |
| Aleix                             | Prat           |                       |                  | Hospital Clínic of Barcelona                                                                   |                                          |                                                         |                                                                                            |

## Supplemental Online Content: Nonauthor Collaborators

\*First name, last name, and suffix (if applicable) are required and will appear in PubMed.

| *First Name and Middle Initial(s) | *Last Name         | *Suffix (eg, Jr, III) | Academic Degrees | Institution                                                         | Location (city, state/province, country) | Role or Contribution, eg, chair, principal investigator | Group (if more than 1 Group listed in the byline) and/or Subgroup (eg, Steering Committee) |
|-----------------------------------|--------------------|-----------------------|------------------|---------------------------------------------------------------------|------------------------------------------|---------------------------------------------------------|--------------------------------------------------------------------------------------------|
| Anna                              | Hester             |                       |                  | Leitung, Brustzentrum der Universität München (LMU)                 |                                          |                                                         |                                                                                            |
| Sofia                             | Dunckelmann        |                       |                  | Leitung, Brustzentrum der Universität München (LMU)                 |                                          |                                                         |                                                                                            |
| Nadia                             | Harbeck            |                       |                  | Leitung, Brustzentrum der Universität München (LMU)                 |                                          |                                                         |                                                                                            |
| Maximilian                        | Marhold            |                       |                  | Medical University of Vienna                                        |                                          |                                                         |                                                                                            |
| Rupert                            | Bartsch            |                       |                  | Medical University of Vienna                                        |                                          |                                                         |                                                                                            |
| Constantin                        | Mannsbarth         |                       |                  | Medical University of Vienna                                        |                                          |                                                         |                                                                                            |
| Lazar                             | Popovic            |                       |                  | Oncology Institute of Vojvodina - University of Novi Sad            |                                          |                                                         |                                                                                            |
| Ivana                             | Božović-Spasojević |                       |                  | Institute for Oncology and Radiology of Serbia                      |                                          |                                                         |                                                                                            |
| Ana                               | Krivokuca          |                       |                  | Institute for Oncology and Radiology of Serbia                      |                                          |                                                         |                                                                                            |
| Marija                            | Dimitrijevic       |                       |                  | Institute for Oncology and Radiology of Serbia                      |                                          |                                                         |                                                                                            |
| Luca                              | Visani             |                       |                  | Florence University Hospital - University of Florence               |                                          |                                                         |                                                                                            |
| Beatrice                          | Bettazzi           |                       |                  | Florence University Hospital - University of Florence               |                                          |                                                         |                                                                                            |
| Lorenzo                           | Livi               |                       |                  | Florence University Hospital - University of Florence               |                                          |                                                         |                                                                                            |
| Caterina                          | Sposetti           |                       |                  | Fondazione IRCCS Istituto Nazionale dei Tumori                      |                                          |                                                         |                                                                                            |
| Valentina                         | Sini               |                       |                  | ASL Roma 1 - Centro Oncologico S. Spirito - Nuovo Regina Margherita |                                          |                                                         |                                                                                            |
| Alessia                           | Rognone            |                       |                  | IRCCS Ospedale San Raffaele                                         |                                          |                                                         |                                                                                            |
| Giampaolo                         | Bianchini          |                       |                  | IRCCS Ospedale San Raffaele                                         |                                          |                                                         |                                                                                            |
| Maria Grazia                      | Patricelli         |                       |                  | IRCCS Ospedale San Raffaele                                         |                                          |                                                         |                                                                                            |
| Emanuela                          | Rabaiotti          |                       |                  | IRCCS Ospedale San Raffaele                                         |                                          |                                                         |                                                                                            |

## Supplemental Online Content: Nonauthor Collaborators

\*First name, last name, and suffix (if applicable) are required and will appear in PubMed.

| *First Name and Middle Initial(s)                      | *Last Name | *Suffix (eg, Jr, III) | Academic Degrees | Institution                                                                                                                | Location (city, state/province, country) | Role or Contribution, eg, chair, principal investigator | Group (if more than 1 Group listed in the byline) and/or Subgroup (eg, Steering Committee) |
|--------------------------------------------------------|------------|-----------------------|------------------|----------------------------------------------------------------------------------------------------------------------------|------------------------------------------|---------------------------------------------------------|--------------------------------------------------------------------------------------------|
| Oreste                                                 | Gentilini  |                       |                  | IRCCS Ospedale San Raffaele                                                                                                |                                          |                                                         |                                                                                            |
| Andrea                                                 | Fontana    |                       |                  | Azienda Ospedaliero Universitaria Pisana - Ospedale Santa Chiara                                                           |                                          |                                                         |                                                                                            |
| Giulia                                                 | Acconci    |                       |                  | Azienda Ospedaliero Universitaria Pisana - Ospedale Santa Chiara                                                           |                                          |                                                         |                                                                                            |
| Erica                                                  | Baldacci   |                       |                  | Azienda Ospedaliero Universitaria Pisana - Ospedale Santa Chiara                                                           |                                          |                                                         |                                                                                            |
| Giulia                                                 | Bianchini  |                       |                  | Azienda Ospedaliero Universitaria Pisana - Ospedale Santa Chiara                                                           |                                          |                                                         |                                                                                            |
| Mirco                                                  | Pistelli   |                       |                  | Università Politecnica delle Marche - Azienda Ospedaliero-Universitaria Ospedali Riuniti Umberto I - GM Lancisi - G Salesi |                                          |                                                         |                                                                                            |
| Sabine                                                 | Linn       |                       |                  | Netherlands Cancer Institute                                                                                               |                                          |                                                         |                                                                                            |
| Sieta                                                  | Kleiterp   |                       |                  | Netherlands Cancer Institute                                                                                               |                                          |                                                         |                                                                                            |
| Daoud A.                                               | Moha       |                       |                  | Netherlands Cancer Institute                                                                                               |                                          |                                                         |                                                                                            |
| NKI-AvL DataDesk<br>Wetenschappelijke<br>Administratie |            |                       |                  | Netherlands Cancer Institute                                                                                               |                                          |                                                         |                                                                                            |
| Rajiv                                                  | Sarin      |                       |                  | Tata Memorial Centre                                                                                                       |                                          |                                                         |                                                                                            |
| Anberson                                               | Sekar      |                       |                  | Tata Memorial Centre                                                                                                       |                                          |                                                         |                                                                                            |
| Francesco                                              | Atzori     |                       |                  | Azienda Ospedaliero Universitaria di Cagliari                                                                              |                                          |                                                         |                                                                                            |
| Francesco                                              | Loi        |                       |                  | Azienda Ospedaliero Universitaria di Cagliari                                                                              |                                          |                                                         |                                                                                            |
| Mariele                                                | Dessi      |                       |                  | Azienda Ospedaliero Universitaria di Cagliari                                                                              |                                          |                                                         |                                                                                            |
| Sarah                                                  | O'Connor   |                       |                  | Peter MacCallum Cancer Centre                                                                                              |                                          |                                                         |                                                                                            |
| Stephanie                                              | Nesci      |                       |                  | Peter MacCallum Cancer Centre                                                                                              |                                          |                                                         |                                                                                            |
| Paul                                                   | James      |                       |                  | Peter MacCallum Cancer Centre                                                                                              |                                          |                                                         |                                                                                            |
| Chris                                                  | Michael    |                       |                  | Peter MacCallum Cancer Centre                                                                                              |                                          |                                                         |                                                                                            |

## Supplemental Online Content: Nonauthor Collaborators

\*First name, last name, and suffix (if applicable) are required and will appear in PubMed.

| *First Name and Middle Initial(s) | *Last Name           | *Suffix (eg, Jr, III) | Academic Degrees | Institution                                                           | Location (city, state/province, country) | Role or Contribution, eg, chair, principal investigator | Group (if more than 1 Group listed in the byline and/or Subgroup (eg, Steering Committee) |
|-----------------------------------|----------------------|-----------------------|------------------|-----------------------------------------------------------------------|------------------------------------------|---------------------------------------------------------|-------------------------------------------------------------------------------------------|
| Fergus J.                         | Couch                |                       |                  | Mayo Clinic (Rochester, USA)                                          |                                          |                                                         |                                                                                           |
| Janet E.                          | Olson                |                       |                  | Mayo Clinic (Rochester, USA)                                          |                                          |                                                         |                                                                                           |
| Nicole L.                         | Larson               |                       |                  | Mayo Clinic (Rochester, USA)                                          |                                          |                                                         |                                                                                           |
| Siddhartha                        | Yadav                |                       |                  | Mayo Clinic (Rochester, USA)                                          |                                          |                                                         |                                                                                           |
| Nerea                             | Lopetegui            |                       |                  | Cleveland Clinic Taussig Cancer Institute                             |                                          |                                                         |                                                                                           |
| Lisa A.                           | Carey                |                       |                  | University of North Carolina - Lineberger Comprehensive Cancer Center |                                          |                                                         |                                                                                           |
| Yara                              | Abdou                |                       |                  | University of North Carolina - Lineberger Comprehensive Cancer Center |                                          |                                                         |                                                                                           |
| Paola                             | Zagami               |                       |                  | University of North Carolina - Lineberger Comprehensive Cancer Center |                                          |                                                         |                                                                                           |
| Roberta                           | Di Rocco             |                       |                  | Azienda USL Toscana Sud Est - Misericordia Hospital                   |                                          |                                                         |                                                                                           |
| Margherita                        | Baldassarri          |                       |                  | Azienda USL Toscana Sud Est - Misericordia Hospital                   |                                          |                                                         |                                                                                           |
| Carmelo                           | Bengala              |                       |                  | Azienda USL Toscana Sud Est - Misericordia Hospital                   |                                          |                                                         |                                                                                           |
| Elene                             | Mariamidze           |                       |                  | Todua Clinic                                                          |                                          |                                                         |                                                                                           |
| Stephanie L.                      | Graff                |                       |                  | Lifespan Cancer Institute                                             |                                          |                                                         |                                                                                           |
| Stephanie A.                      | Haddad               |                       |                  | Lifespan Cancer Institute                                             |                                          |                                                         |                                                                                           |
| Emma                              | Safran               |                       |                  | Lifespan Cancer Institute                                             |                                          |                                                         |                                                                                           |
| Leonor                            | Vasconcelos de Matos |                       |                  | Champalimaud Foundation                                               |                                          |                                                         |                                                                                           |
| Arlindo                           | Ferreira             |                       |                  | Champalimaud Foundation                                               |                                          |                                                         |                                                                                           |
| Serena                            | Negri                |                       |                  | San Gerardo Hospital ASST Monza                                       |                                          |                                                         |                                                                                           |
| Cristina                          | Dell'Oro             |                       |                  | San Gerardo Hospital ASST Monza                                       |                                          |                                                         |                                                                                           |
| Alessandra                        | Inzoli               |                       |                  | San Gerardo Hospital ASST Monza                                       |                                          |                                                         |                                                                                           |

## Supplemental Online Content: Nonauthor Collaborators

\*First name, last name, and suffix (if applicable) are required and will appear in PubMed.

| *First Name and Middle Initial(s) | *Last Name       | *Suffix (eg, Jr, III) | Academic Degrees | Institution                                                                | Location (city, state/province, country) | Role or Contribution, eg, chair, principal investigator | Group (if more than 1 Group listed in the byline) and/or Subgroup (eg, Steering Committee) |
|-----------------------------------|------------------|-----------------------|------------------|----------------------------------------------------------------------------|------------------------------------------|---------------------------------------------------------|--------------------------------------------------------------------------------------------|
| Clarissa                          | Costa            |                       |                  | San Gerardo Hospital ASST Monza                                            |                                          |                                                         |                                                                                            |
| Liliana                           | Marchetta        |                       |                  | San Gerardo Hospital ASST Monza                                            |                                          |                                                         |                                                                                            |
| Maryam                            | Lustberg         |                       |                  | Yale University                                                            |                                          |                                                         |                                                                                            |
| Deanna                            | Blansky          |                       |                  | Yale University                                                            |                                          |                                                         |                                                                                            |
| June                              | Jeon             |                       |                  | Yale University                                                            |                                          |                                                         |                                                                                            |
| Norin                             | Ansari           |                       |                  | Yale University                                                            |                                          |                                                         |                                                                                            |
| Dione                             | Aguilar-y-Mendez |                       |                  | Hospital Zambrano Hellion - Tecnologico de Monterrey                       |                                          |                                                         |                                                                                            |
| Teresa K.                         | Woodruff         |                       |                  | Michigan State University                                                  |                                          |                                                         |                                                                                            |
| Monique                           | Swain            |                       |                  | Michigan State University                                                  |                                          |                                                         |                                                                                            |
| Madison                           | Miller           |                       |                  | Michigan State University                                                  |                                          |                                                         |                                                                                            |
| Richard                           | Leach            |                       |                  | Michigan State University                                                  |                                          |                                                         |                                                                                            |
| Alessandra                        | Fabi             |                       |                  | Policlinico Universitario Agostino Gemelli IRCCS                           |                                          |                                                         |                                                                                            |
| Antonella                         | Palazzo          |                       |                  | Policlinico Universitario Agostino Gemelli IRCCS                           |                                          |                                                         |                                                                                            |
| Ida                               | Paris            |                       |                  | Policlinico Universitario Agostino Gemelli IRCCS                           |                                          |                                                         |                                                                                            |
| Joanna                            | Kufel-Grabowska  |                       |                  | Poznan University of Medical Sciences, University Hospital of H. Swiecicki |                                          |                                                         |                                                                                            |
| Agnieszka                         | Synowiec         |                       |                  | Military institute of Medicine of Warsaw                                   |                                          |                                                         |                                                                                            |
| Miriam                            | Hancinova        |                       |                  | St. Elisabeth Cancer Institute (Onkologicky ustav sv. Alzbety-OUSA)        |                                          |                                                         |                                                                                            |
| Lukas                             | Tarbaj           |                       |                  | St. Elisabeth Cancer Institute (Onkologicky ustav sv. Alzbety-OUSA)        |                                          |                                                         |                                                                                            |
| Emir                              | Sokolović        |                       |                  | Clinical Center University of Sarajevo                                     |                                          |                                                         |                                                                                            |

## Supplemental Online Content: Nonauthor Collaborators

\*First name, last name, and suffix (if applicable) are required and will appear in PubMed.

| *First Name and Middle Initial(s) | *Last Name       | *Suffix (eg, Jr, III) | Academic Degrees | Institution                            | Location (city, state/province, country) | Role or Contribution, eg, chair, principal investigator | Group (if more than 1 Group listed in the byline) and/or Subgroup (eg, Steering Committee) |
|-----------------------------------|------------------|-----------------------|------------------|----------------------------------------|------------------------------------------|---------------------------------------------------------|--------------------------------------------------------------------------------------------|
| Semir                             | Bešlija          |                       |                  | Clinical Center University of Sarajevo |                                          |                                                         |                                                                                            |
| Timur                             | Cerić            |                       |                  | Clinical Center University of Sarajevo |                                          |                                                         |                                                                                            |
| Berisa                            | Hasanbegović     |                       |                  | Clinical Center University of Sarajevo |                                          |                                                         |                                                                                            |
| William D                         | Foulkes          |                       |                  | Mc Gill University                     |                                          |                                                         |                                                                                            |
| Manuel A.                         | Bianchi          |                       |                  | Hospital Universitario 12 de Octubre   |                                          |                                                         |                                                                                            |
| Pablo                             | Tolosa           |                       |                  | Hospital Universitario 12 de Octubre   |                                          |                                                         |                                                                                            |
| Laura                             | Alvaro           |                       |                  | Hospital Universitario 12 de Octubre   |                                          |                                                         |                                                                                            |
| Louise                            | Eriksson Bergman |                       |                  | Karolinska University Hospital         |                                          |                                                         |                                                                                            |
| Nicoleta                          | Antone           |                       |                  | Institute of Oncology "Ion Chiricuta"  |                                          |                                                         |                                                                                            |
| Cristina                          | Damian           |                       |                  | Institute of Oncology "Ion Chiricuta"  |                                          |                                                         |                                                                                            |
