# Supplementary material
Source: PubMed Central journal article supplement (PMC10704340)
Supplement: jama-e2325463-s004.pdf [file jama-e2325463-s004.pdf]

Lambertini M, Blondeaux E, Agostinetti E, et al; BRCA BCY Collaboration. Pregnancy after breast cancer in young *BRCA* carriers: an international hospital-based cohort study. *JAMA*. Published online December 7, 2023. doi:10.1001/jama.2023.25463

## Data Sharing Statement

### Data

**Data available:** Yes

**Data types:** Deidentified participant data

**How to access data:** Individual participant data that underlies the results reported in this article, after de-identification (text, tables, figures, and appendix) will be available for further sharing. Data will be available following article publication.

**When available:** With publication

### Supporting Documents

**Document types:** None

### Additional Information

**Who can access the data:** Proposal should be directed to [matteo.lambertini@unige.it](mailto:matteo.lambertini@unige.it)

**Types of analyses:** The types of analyses allowed will be those able to achieve the aims of the approved proposal.

**Mechanisms of data availability:** Data will be shared with researchers who provide a methodologically sound proposal.
